# Supplementary material
Source: PubMed Central journal article supplement (PMC7335792)
Supplement: supp_RA120.012432_157900_2_supp_496168_q7h9jh.pdf [file supp_RA120.012432_157900_2_supp_496168_q7h9jh.pdf]

A fluorescent timer reporter enables sorting of insulin secretory granules by age

**Belinda Yau<sup>1,2</sup>, Lori Hays<sup>3</sup>, Cassandra Liang<sup>4</sup>, David Ross Laybutt<sup>4,5</sup>, Helen E Thomas<sup>6,7</sup>, Jenny E Gunton<sup>8,9</sup>, Lindy Williams<sup>10</sup>, Wayne J Hawthorne<sup>10</sup>, Peter Thorn<sup>1,11</sup>, Christopher J Rhodes<sup>12</sup> and Melkam A Kebede<sup>1,2</sup>.**

Running title: *Sorting out young and old insulin granules*

<sup>1</sup> Charles Perkins Centre, The University of Sydney, Sydney, New South Wales, Australia.

<sup>2</sup> School of Life and Environmental Sciences, Faculty of Science, The University of Sydney, Sydney, New South Wales, Australia.

<sup>3</sup> Edmonds Community College, STEM- Dept. of Biology, 20000 68th Avenue W, Lynnwood, WA 98036, USA.

<sup>4</sup> Garvan Institute of Medical Research, Sydney, NSW, Australia

<sup>5</sup> St Vincent's Clinical School, UNSW Sydney, Sydney, NSW, Australia

<sup>6</sup> St. Vincent's Institute, Fitzroy, VIC, Australia.

<sup>7</sup> Department of Medicine, St. Vincent's Hospital, The University of Melbourne, Fitzroy, VIC, Australia.

<sup>8</sup> Faculty of Health and Medicine, The University of Sydney, Sydney.

<sup>9</sup> The Westmead Institute for Medical Research, The University of Sydney, Westmead.

<sup>10</sup> Faculty of Medicine and Health, The University of Sydney, Sydney, NSW, Australia; National Pancreas and Islet Transplant Unit (NPITU), Westmead Hospital, Sydney, NSW, Australia.

<sup>11</sup> Discipline of Physiology, School of Medical Sciences, Charles Perkins Centre, University of Sydney, Camperdown, 2006, Australia.

<sup>12</sup> AstraZeneca, Cardiovascular, Renal and Metabolism, Biopharmaceuticals R&D, One Medimmune Way, Gaithersburg, MD 20878, USA.

Correspondence should be addressed to: Melkam Kebede: D-17 Charles Perkins Centre, Orphans School Creek lane, University of Sydney, Camperdown, NSW 2006, Australia; P: +61 2 8627 0164; Email: [melkam.kebede@sydney.edu.au](mailto:melkam.kebede@sydney.edu.au); ORCID: <https://orcid.org/0000-0001-9686-7378>

**Keywords:** insulin, beta-cell, vesicles, insulin secretion, Type 2 diabetes, insulin secretory granule (SG), exocytosis, granule aging, fluorescent timer, dsRed-E5

## Supplementary Figure 1

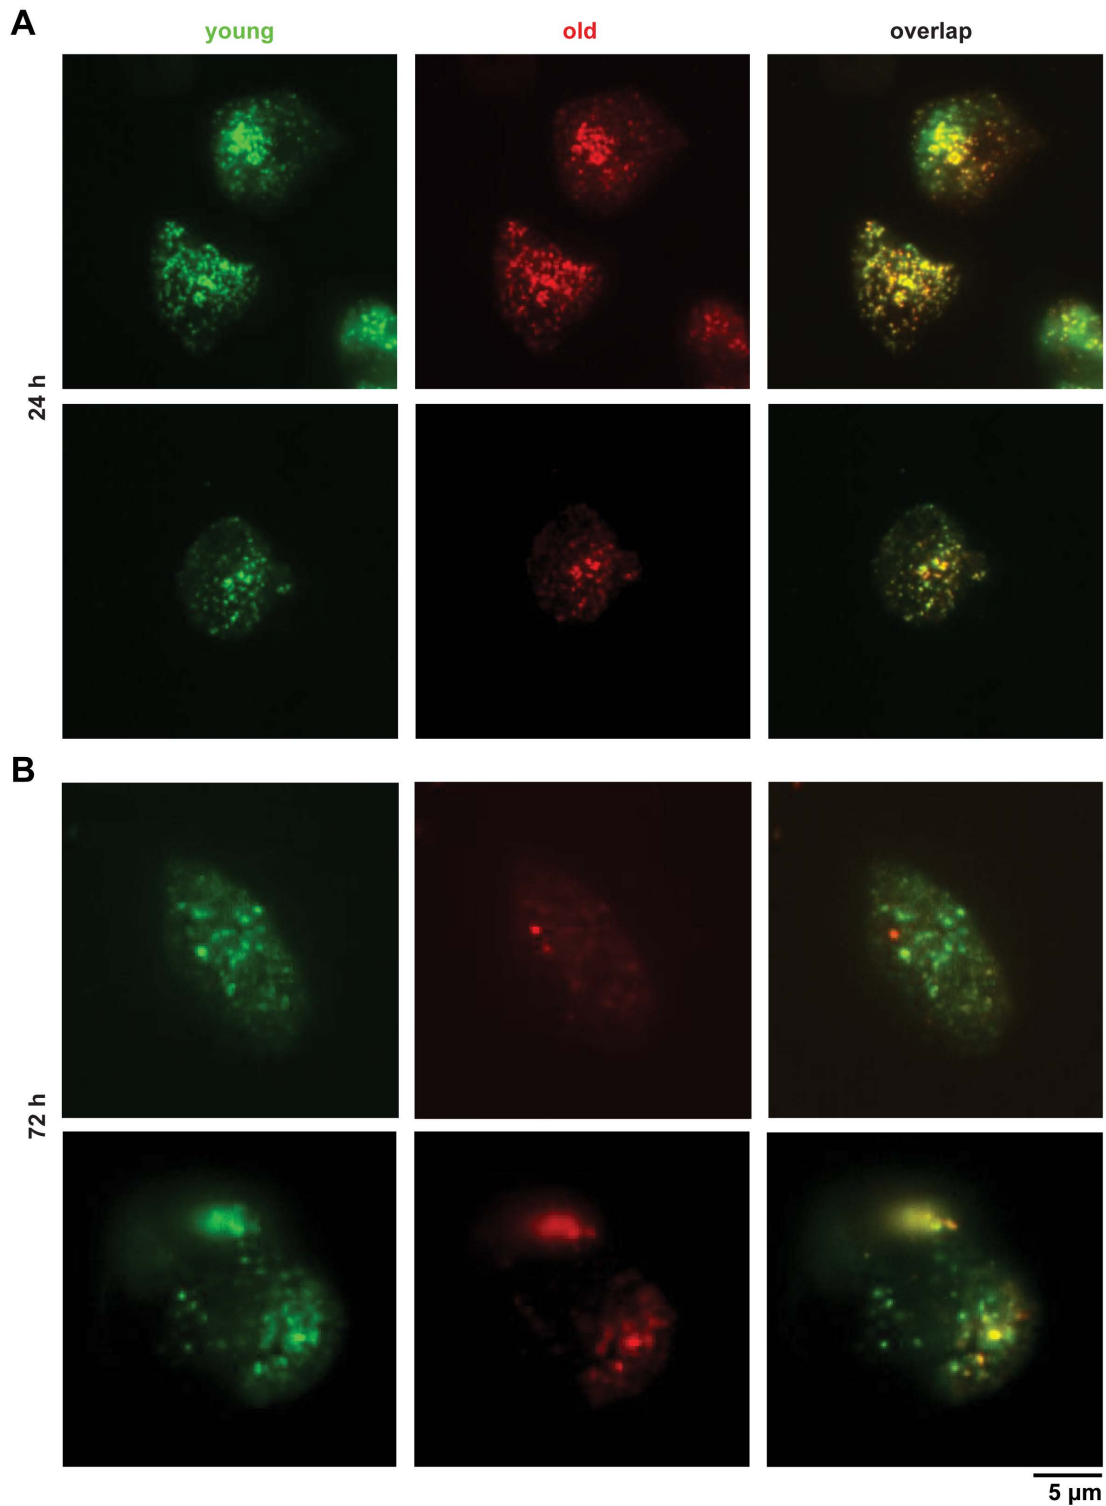

**Supplementary Figure 1. Young and old insulin granules labelled with syncollin-dsRedE5TIMER differentially localise at the plasma membrane.** TIRF microscopy at 488 nm and 561 nm at an illumination angle of  $\sim 110^\circ$  at the plasma membrane of INS1 rat beta cell line fixed at **(A)** 24 h or **(B)** 72 h post-transduction with syncollin-dsRedE5TIMER.

## Supplementary Figure 2

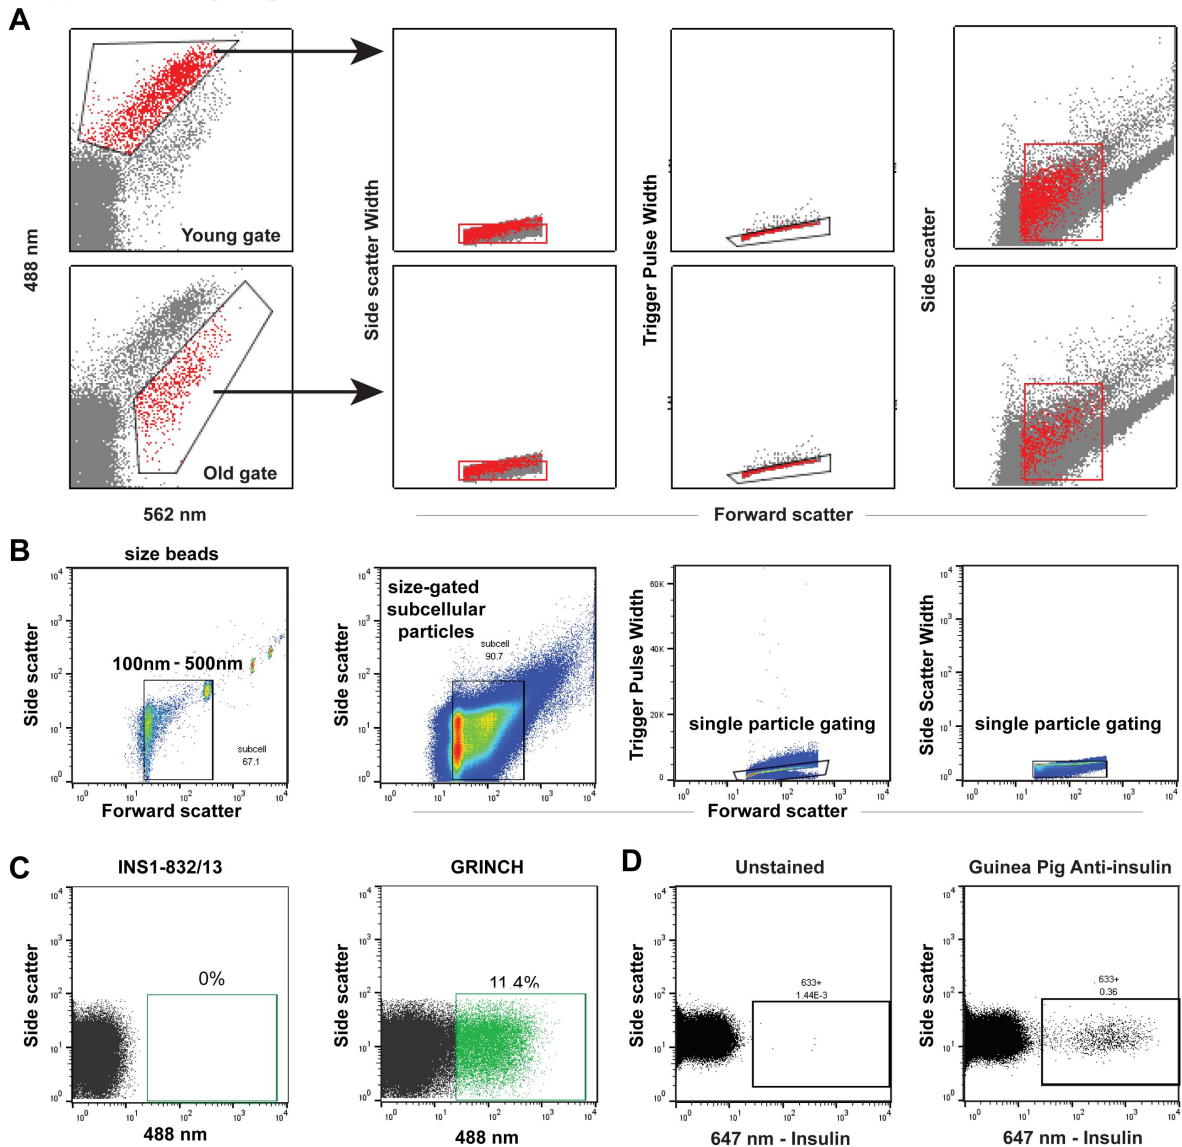

**Supplementary Figure 2. Syncollin-dsRedE5TIMER-expressing granules are genuine granules in INS1 cells.** (A) Backgating analysis of young and old granule populations. (B) FAOS gating strategy for single subcellular particles between 100 nm and 500 nm, as described in Figure 2B, can be applied unchanged to the INS1 rat beta cell line. (C) FAOS analysis of INS1 832/13 cells and hPro-CpepsfGFP-expressing INS1 832/13 GRINCH cells, gated for GFP fluorescence at 488 nm. (D) FAOS analysis of unstained Min6 and Min6 stained with guinea pig anti-insulin and Alexa Fluor 647-conjugated anti-guinea pig secondary fluorophore, gated for fluorescence at 633 nm.
